# Supplementary material for: Cisplatin-Resistant Urothelial Bladder Cancer Cells Undergo Metabolic Reprogramming beyond the Warburg Effect
Source: MDPI journal article supplement (doi:10.3390/cancers16071418), 2024-04-05
Supplement: s1 [file s1]

## - SUPPLEMENTARY MATERIALS -

**Table S1.** Antibodies used for Western blotting (WB) and immunofluorescence (IFC).

|                      | Antibody              | Reference (Company)                   | WB dilution | IFC dilution |
|----------------------|-----------------------|---------------------------------------|-------------|--------------|
| Primary antibodies   | Bcl-xL                | sc-8392 (Santa Cruz Biotechnology®)   | 1:300       | -            |
|                      | ACC                   | #3662 (Cell Signalling® Technology)   | 1:1000      |              |
|                      | Bim                   | #2933 (Cell Signalling® Technology)   | 1:1000      | -            |
|                      | Caspase 9             | #9508 (Cell Signalling® Technology)   | 1:500       | -            |
|                      | CD147                 | sc-71038 (Santa Cruz Biotechnology®)  | 1:500       | 1:500        |
|                      | FAS                   | sc-48357 (Santa Cruz Biotechnology®)  | 1:2000      |              |
|                      | GLUT1                 | ab15309 (AbCam)                       | 1:500       | -            |
|                      | HIF1 $\alpha$         | #610958 (BD Biosciences)              | 1:500       |              |
|                      | HK2                   | ab104836 (AbCam)                      | 1:2000      |              |
|                      | LDHA                  | sc-100775 (Santa Cruz Biotechnology®) | 1:1000      | -            |
|                      | MCT1                  | sc-365501 (Santa Cruz Biotechnology®) | 1:500       | -            |
|                      |                       | AB3538P (Chemicon®)                   | -           | 1:200        |
|                      | MCT4                  | sc-50329 (Santa Cruz Biotechnology®)  | 1:500       | 1:500        |
|                      | PARP                  | #9542 (Cell Signalling® Technology)   | 1:500       | -            |
|                      | PDK                   | sc-28783 (Santa Cruz Biotechnology®)  | 1:500       |              |
| Secondary antibodies | m-IgG $\kappa$ BP-HRP | sc-516102 (Santa Cruz Biotechnology®) | 1:2500      |              |
|                      | IgG-HRP               | sc-2357 (Santa Cruz Biotechnology®)   | 1:2500      |              |
|                      | Alexa Fluor® 594      | A11032 (Invitrogen™)                  |             | 1:500        |
|                      | Alexa Fluor® 488      | A11008 (Invitrogen™)                  |             | 1:500        |
| Loading controls     | $\beta$ -Actin        | sc-8432 (Santa Cruz Biotechnology®)   | 1:500       |              |
|                      | $\alpha$ -Tubulin     | ab15246 (AbCam)                       | 1:2500      |              |

A

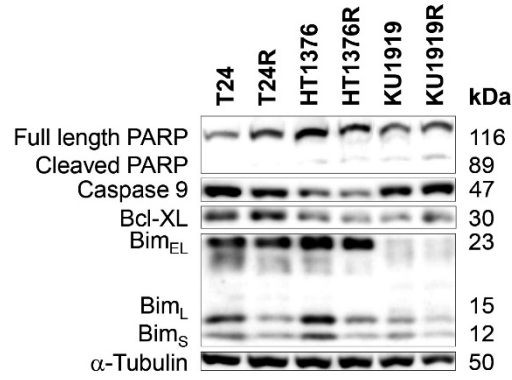

B

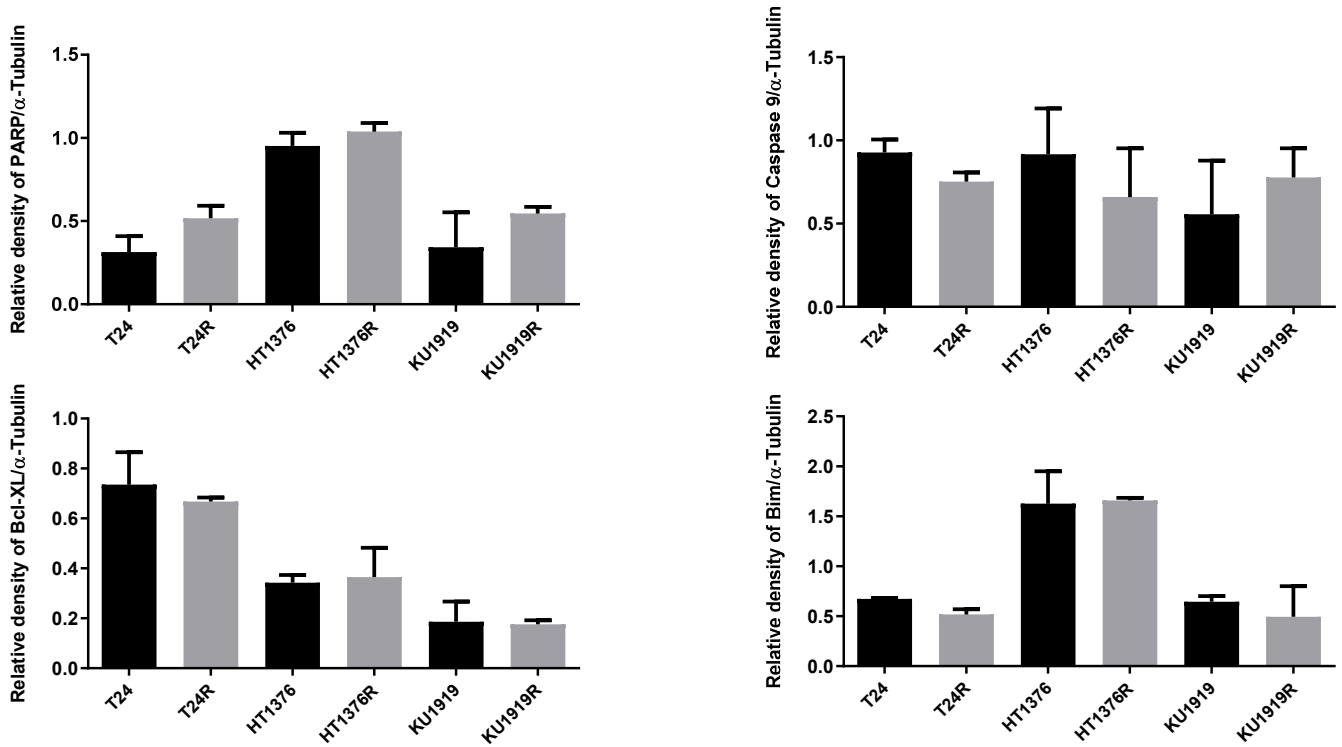

C

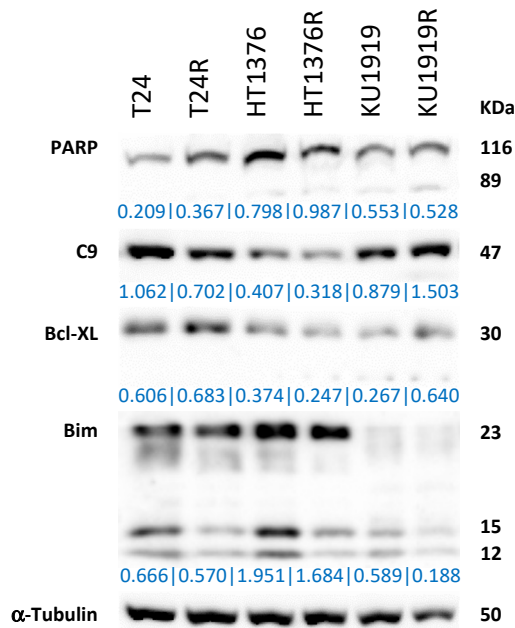

**Figure S1.** The representative Western blots of baseline levels of cell-death biomarkers in isogenic pairs of urothelial bladder cancer cell lines (A), their respective quantification (B) and the original Western blots (C). Results are representative of similar blots from three independent cell lysates. Intensity ratios relative to  $\alpha$ -Tubulin are shown in blue.

A

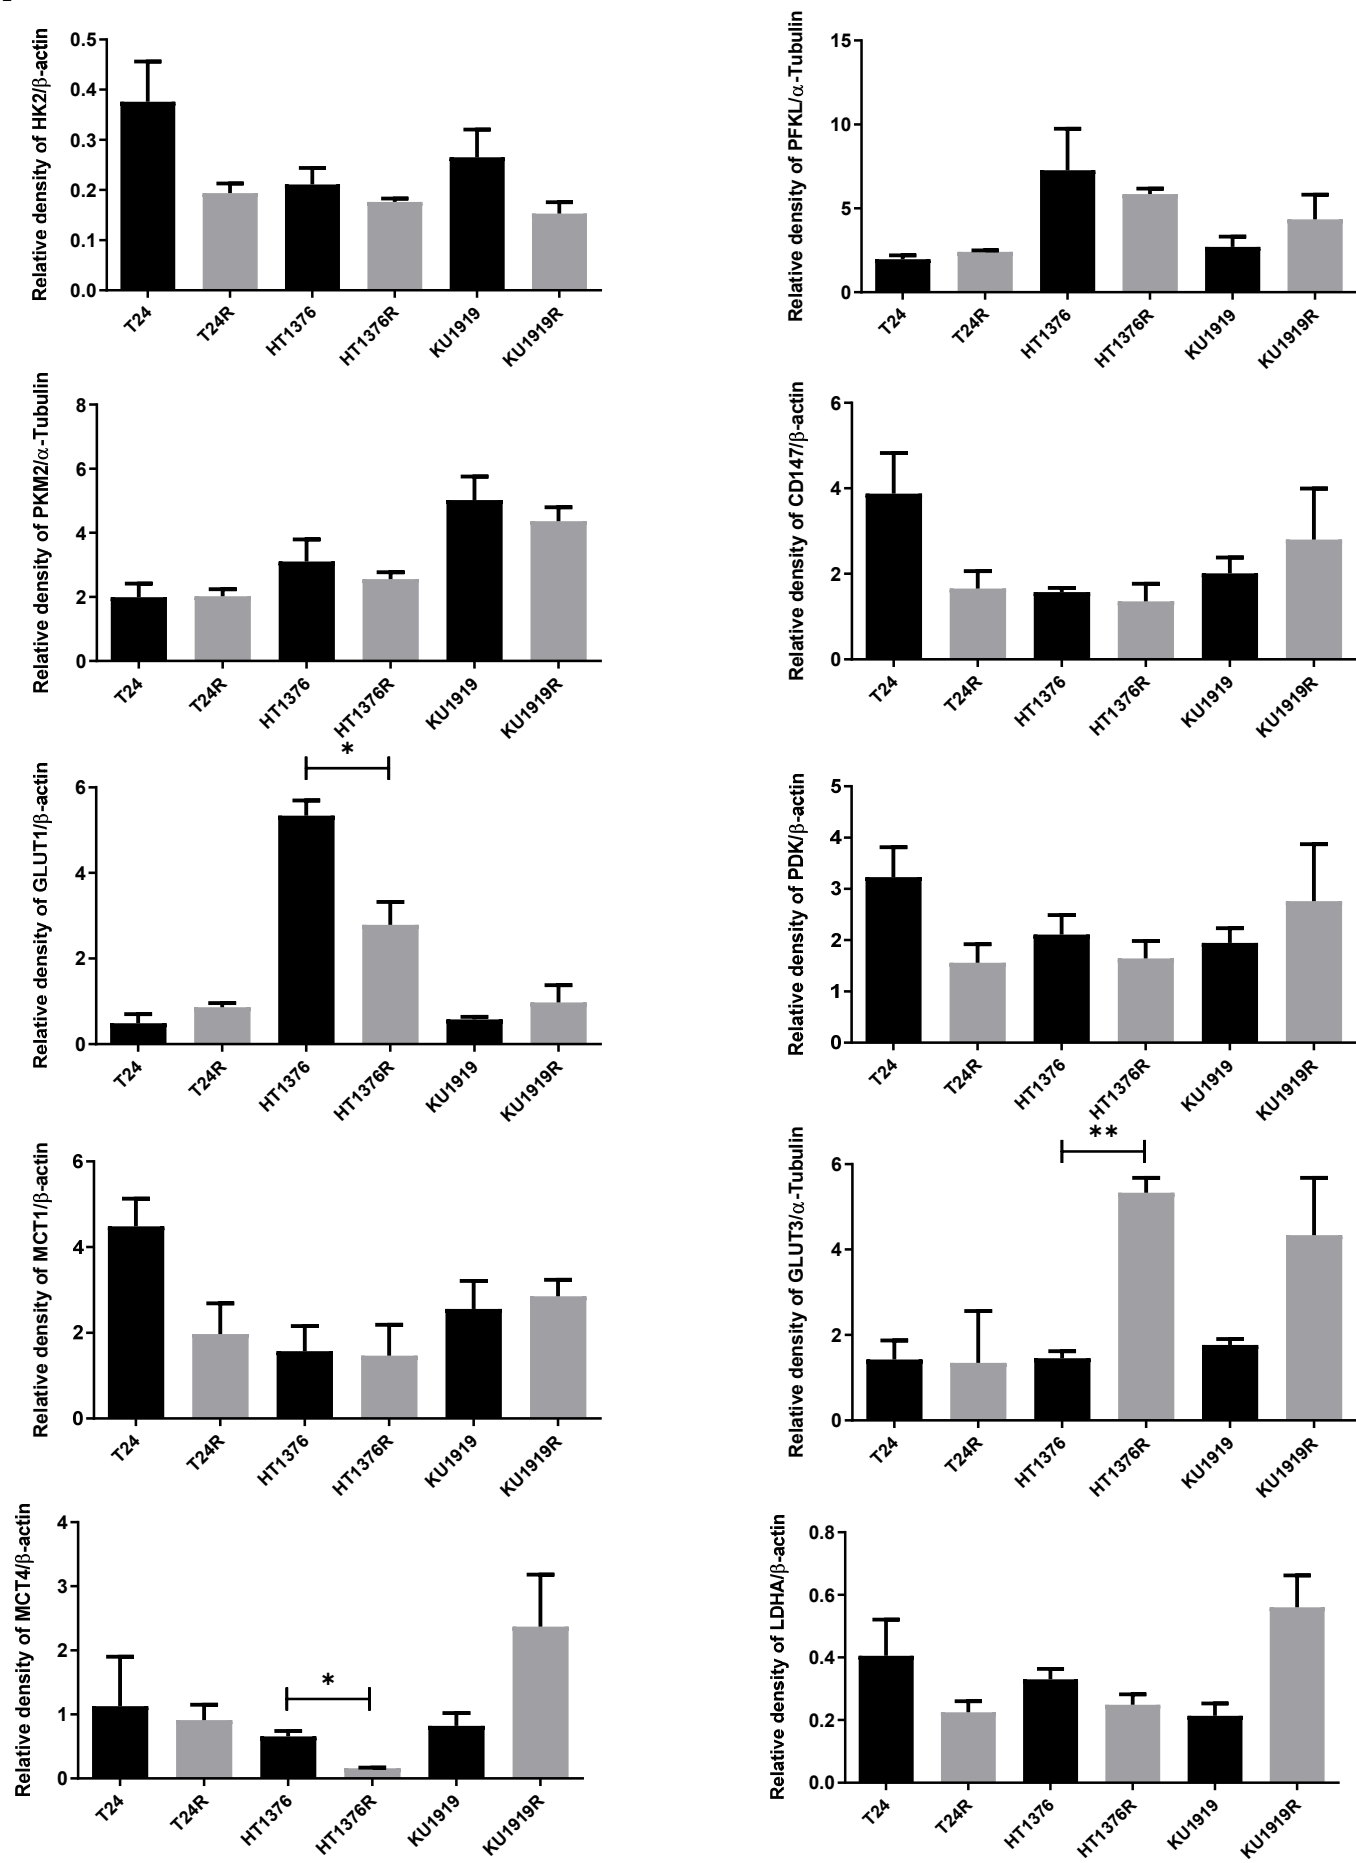

B

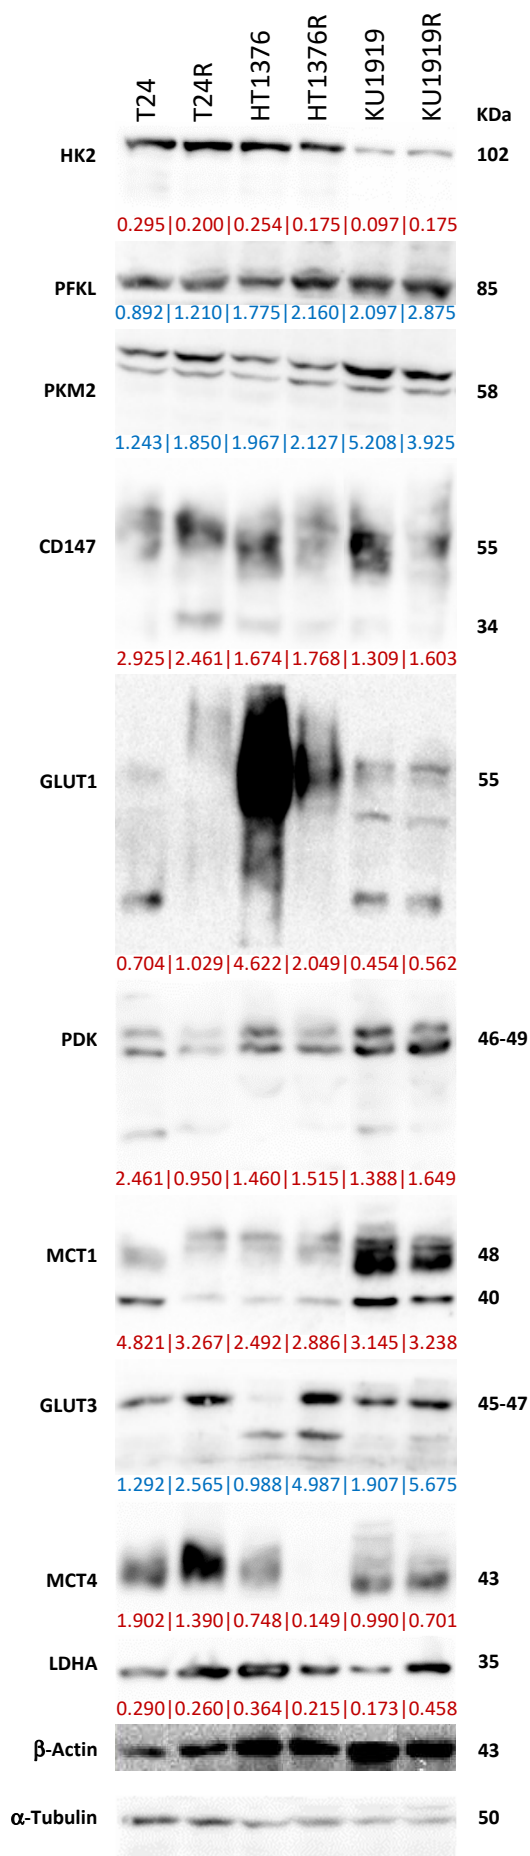

**Figure S2.** Quantification of the Western blot results shown in Figure 2A (A) and the original Western blots (B). Intensity ratios relative to  $\beta$ -Actin and  $\alpha$ -Tubulin are shown in red and in blue, respectively. \* $p < 0.05$ , parental cells *versus* cisplatin-resistant cells.

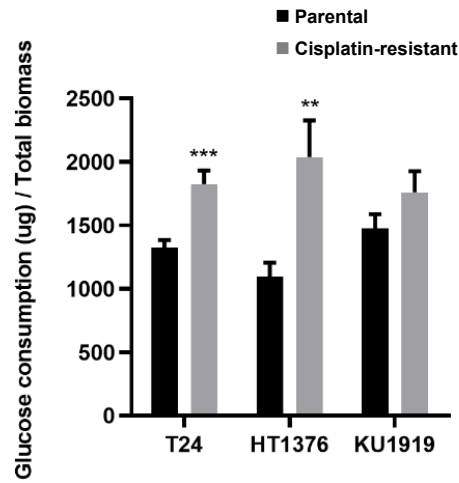

**Figure S3.** Glucose consumption of isogenic pairs of urothelial bladder cancer cell lines, assessed in the growth medium 24h post-incubation. \*\*  $p < 0.01$ , \*\*\*  $p < 0.005$ , parental cells *versus* cisplatin-resistant cells.

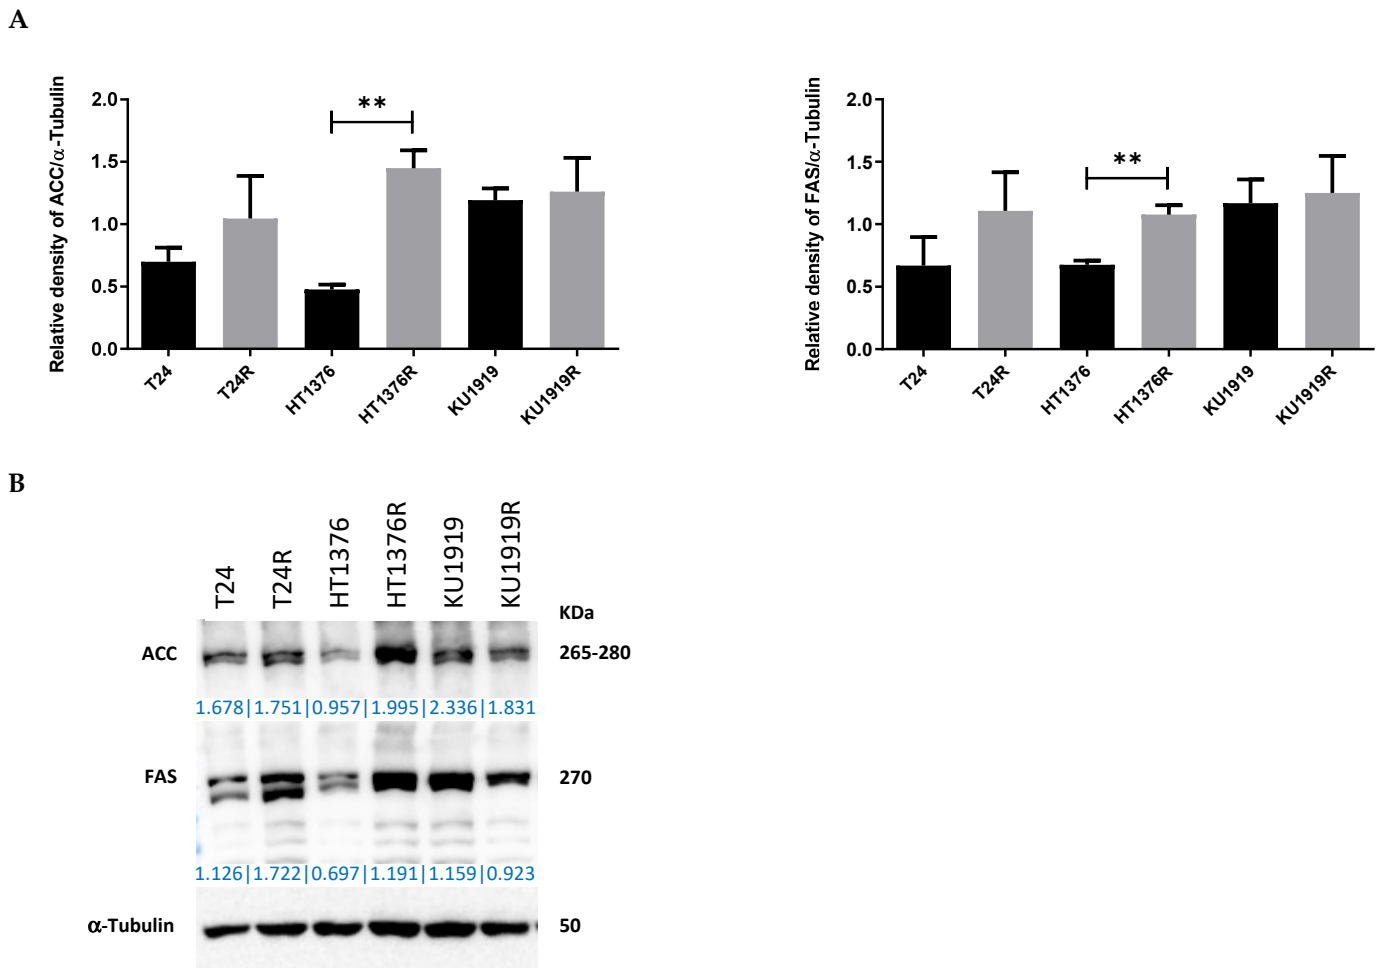

**Figure S4.** Quantification of the Western blot results shown in Figure 5 (A) and the original Western blots (B). Intensity ratios relative to α-Tubulin are shown in blue. \*\*  $p < 0.01$ , parental cells *versus* cisplatin-resistant cells.

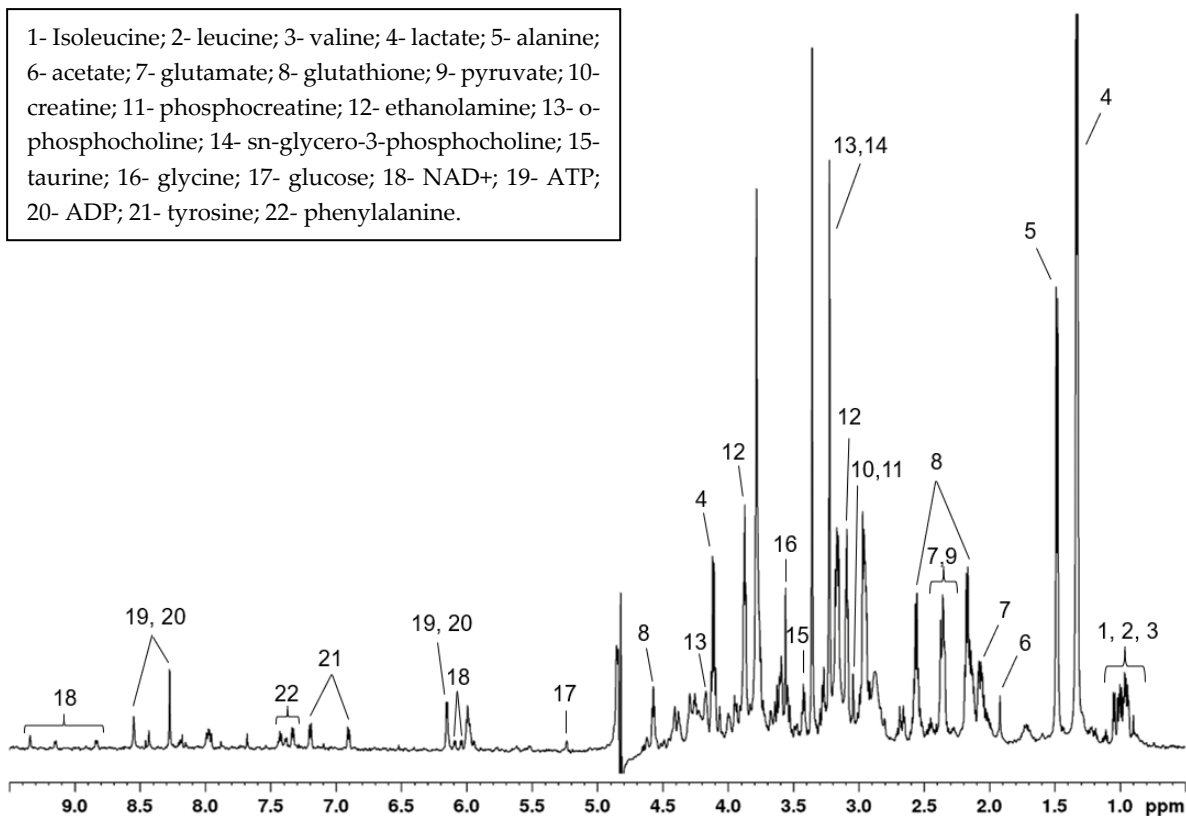

**Figure S5.** Typical <sup>1</sup>H NMR spectra of the intracellular extract.
